# Supplementary material for: Oral delivery of curcumin via porous polymeric nanoparticles for effective ulcerative colitis therapy
Source: Royal Society of Chemistry journal article supplement (doi:10.1039/c7tb00328e), 2017-01-01

## Electronic Supplementary Information (ESI)

### Oral delivery of curcumin *via* porous polymeric nanoparticles for effective ulcerative colitis therapy

Qiubing Chen,<sup>‡a</sup> Xiaoying Si,<sup>‡a</sup> Lijun Ma,<sup>a</sup> Panpan Ma,<sup>a</sup> Meili Hou,<sup>a</sup> Shuang Bai,<sup>a</sup> Xiaoshuai Wu,<sup>a</sup> Ying Wan<sup>\*b</sup>, Bo Xiao<sup>\*a,c</sup> and Didier Merlin<sup>c,d</sup>

<sup>a</sup>Institute for Clean Energy and Advanced Materials, Faculty of Materials and Energy, Southwest University, Chongqing, 400715, P. R. China

<sup>b</sup>College of Life Science and Technology, Huazhong University of Science and Technology, Wuhan 430074, P. R. China

<sup>c</sup>Center for Diagnostics and Therapeutics, Institute for Biomedical Science, Georgia State University, Atlanta, 30302, USA

<sup>d</sup>Atlanta Veterans Affairs Medical Center, Decatur, 30033, USA

<sup>‡</sup>These authors contributed equally to this work.

\*Author for correspondence

Dr. Ying Wan, Email: [ying\\_wan@hust.edu.cn](mailto:ying_wan@hust.edu.cn)

Dr. Bo Xiao, Email: [bxiao@gsu.edu](mailto:bxiao@gsu.edu)

Supplementary Figure 1. *In vitro* cytotoxicity of non-porous NPs and porous NPs against Raw 264.7 macrophages (a) and CT-26 cells (b) after co-incubation for 24 h based on MTT assays.

Each point represents the mean  $\pm$  S.E.M. (n=5).

### Supplementary Fig. 1

Chen Q. et al.

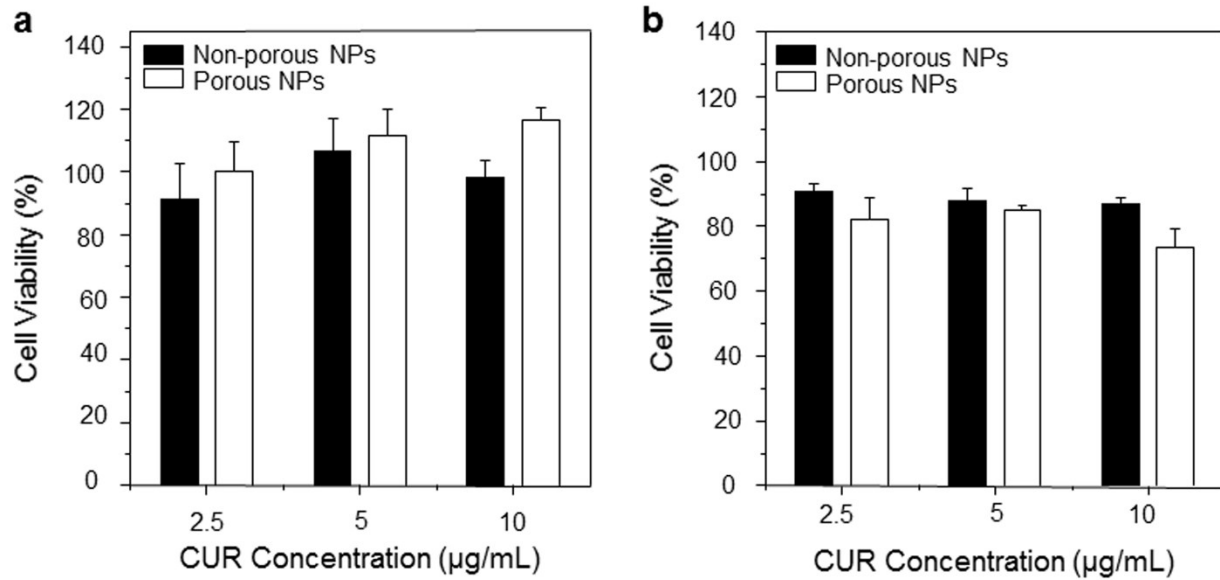

Supplement: c7tb00328e1.pdf [file c7tb00328e1.pdf]
